# Supplementary material for: Local and distant tumor dormancy during early stage breast cancer are associated with the predominance of infiltrating T effector subsets
Source: Springer Nature journal article supplement (doi:10.1186/s13058-020-01357-9), 2020-10-28

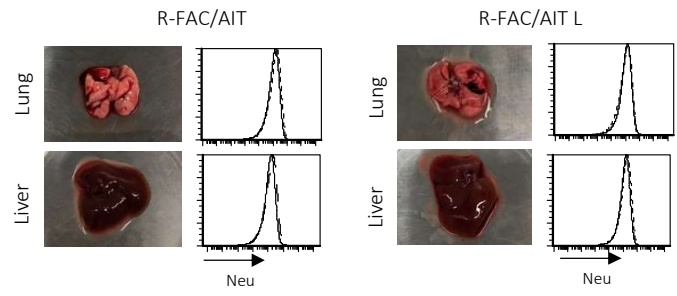

Supplement: MOESM4 [file 18531132]
